# Supplementary material for: Anti-Atherogenic Actions of the Lab4b Consortium of Probiotics In Vitro
Source: MDPI journal article supplement (doi:10.3390/ijms24043639), 2023-02-11
Supplement: s1 [file s1]

## Supplementary Data

### Anti-atherogenic actions of the Lab4b consortium of probiotics *in vitro*

Victoria L. O'Morain <sup>1</sup>, Jing Chen <sup>1</sup>, Sue F. Plummer <sup>2</sup>, Daryn R. Michael <sup>2</sup> and Dipak P. Ramji <sup>1,\*</sup>

<sup>1</sup> Cardiff School of Biosciences, Cardiff University, Sir Martin Evans Building, Museum Avenue, Cardiff CF10 3AX, UK

<sup>2</sup> Cultech Limited, Unit 2 Christchurch Road, Baglan Industrial Park, Port Talbot SA12 7BZ, UK

\* Correspondence: Professor Dipak P. Ramji, Cardiff School of Biosciences, Cardiff University, Sir Martin Evans Building, Museum Avenue, Cardiff CF10 3AX, UK. Tel: 0044 (0)29 20876753; Email: Ramji@Cardiff.ac.uk

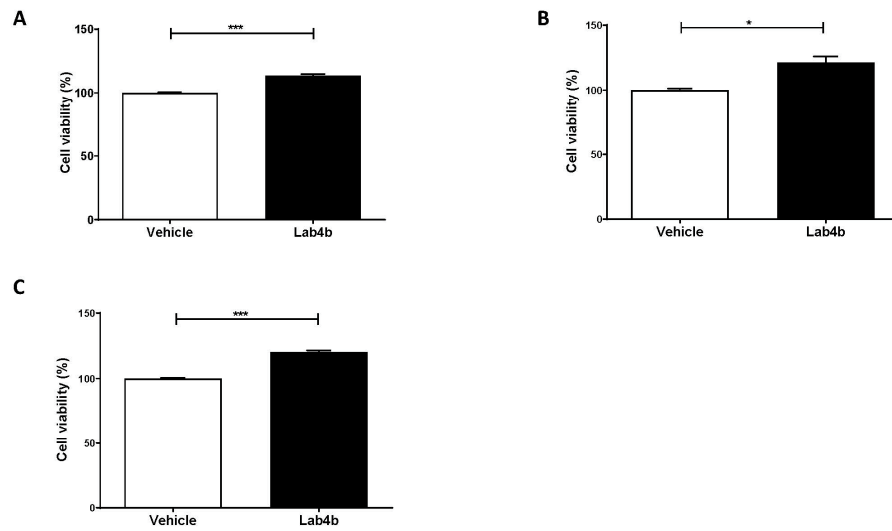

**Figure S1.** Lab4 CM had no detrimental effect on viability of all cell culture model systems used. THP-1 macrophages (A), HMDM (B), and HASMC (C) were treated for 24 h with vehicle or 1.5  $\mu\text{g/mL}$  of Lab4b CM. Cell viability was determined by following the release of the LDH enzyme into the medium. Cell viability is shown as a percentage relative to the vehicle control, which was arbitrarily assigned as 100%. Data are mean  $\pm$  SEM from three independent experiments, and statistical analysis was carried out using an unpaired Student's t-test (A,C) or Mann-Whitney test (B) (\*,  $p \leq 0.05$ ; \*\*\*,  $p \leq 0.001$ ).

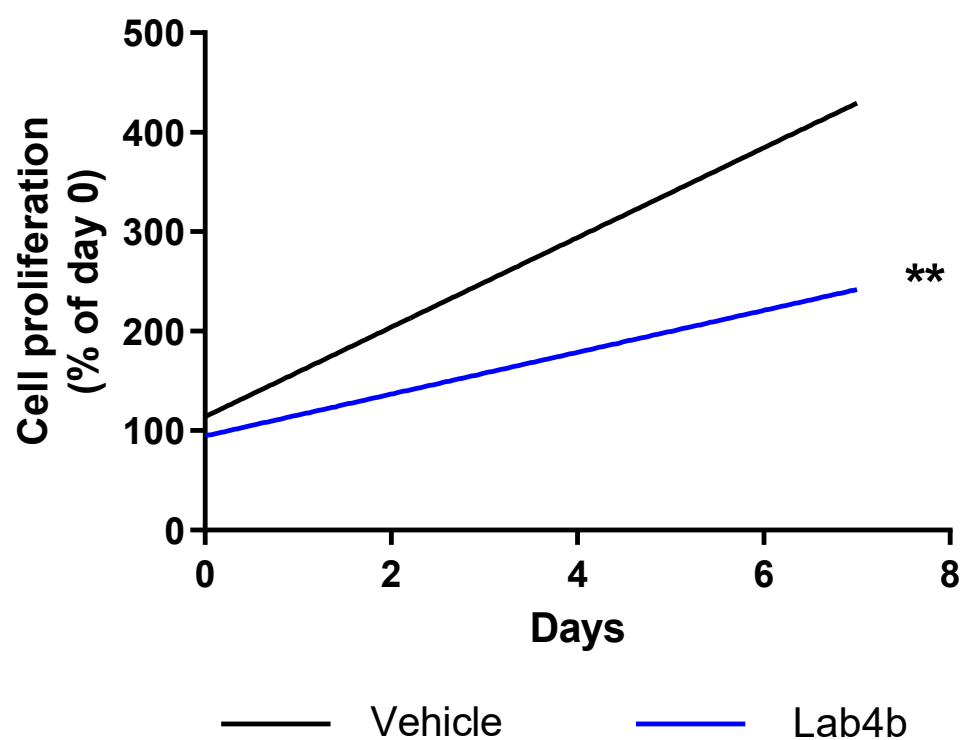

**Figure S2.** Lab4b CM decreased the proliferation of THP-1 monocytes over a 7-day period. THP-1 monocytes treated with either vehicle or 1.5  $\mu\text{g/mL}$  Lab4b CM were counted over a 7-day period. Data are presented as linear regression of percentage change in cell number carried out using GraphPad Prism 9 from three independent experiments (\*\*  $p \leq 0.01$ ).

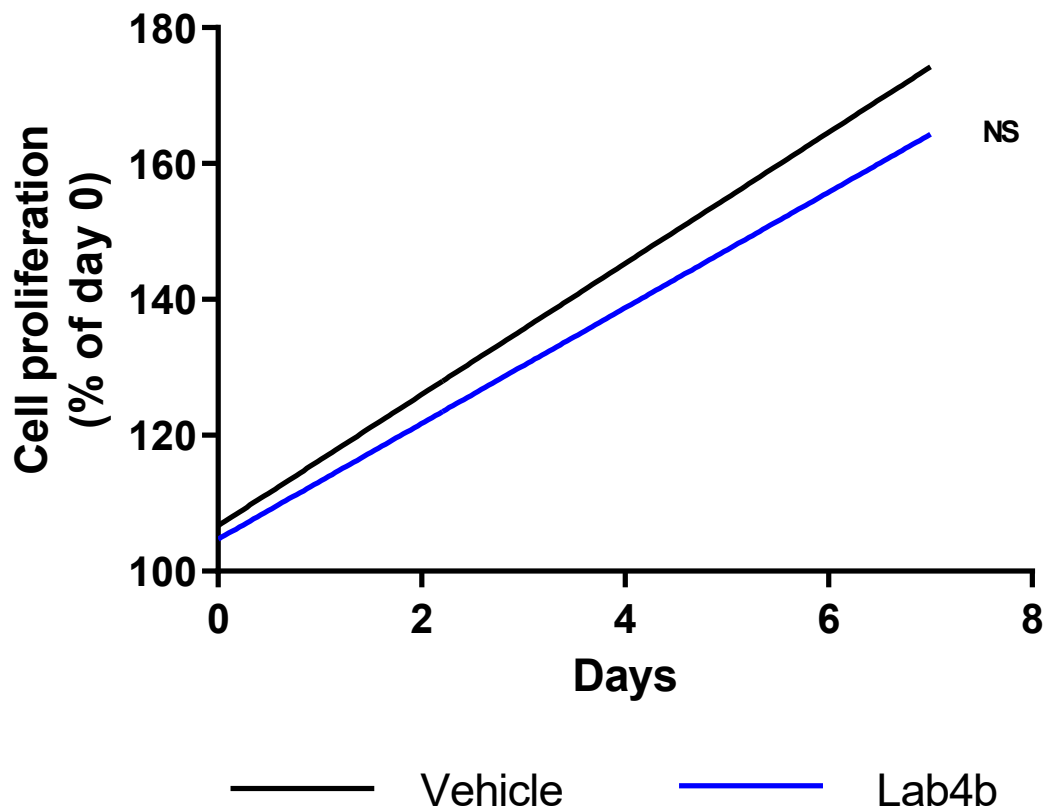

**Figure S3.** The effect of Lab4b CM on proliferation of HASMC over 7-day period. HASMC were treated with either vehicle or 1.5  $\mu\text{g/mL}$  of Lab4b CM, and cellular proliferation was assessed by crystal violet staining over a 7-day period. Linear regression of percentage change in cell numbers from day 0 was determined from three independent experiments using GraphPad Prism 9 (NS, not significant).
